# Supplementary material
Source: publisher figshare collection journal article supplement (https://acs.figshare.com/ndownloader/files/15923456)
Supplement: Supplementary file 1 [file 15923456]

## Supporting Information

### Sorbic Acid as a Triplet Probe: Triplet Energy and Reactivity with Triplet-State Dissolved Organic Matter via $^1\text{O}_2$ Phosphorescence

Kyle J. Moor, Markus Schmitt, Paul R. Erickson, and Kristopher McNeill\*

*Institute of Biogeochemistry and Pollutant Dynamics (IBP), Department of Environmental Systems Science, ETH Zurich, 8092 Zurich, Switzerland*

**Pages: 35**

**Figures: 31**

**Tables: 4**

#### Table of Contents

|                                                                                      |     |
|--------------------------------------------------------------------------------------|-----|
| Section 1. $^1\text{O}_2$ Phosphorescence Data Fitting Procedures.....               | S2  |
| Section 2. Low-Temperature Phosphorescence.....                                      | S5  |
| Section 3. Transient Absorption Measurements.....                                    | S6  |
| Section 4. Sorbic Acid Quenching of Model Sensitizer Triplets.....                   | S10 |
| Section 5. Sorbic Acid Quenching of $^3\text{CDOM}^*$ .....                          | S15 |
| Section 6. Comparing $k_{HDA}$ from Single Pool and Two-Pool Fitting Approaches..... | S32 |
| Section 7. Past Estimates of Triplet Distribution in CDOM.....                       | S34 |

## Section 1. <sup>1</sup>O<sub>2</sub> Phosphorescence Data Fitting Procedures

### *Global Kinetic Fitting Approach*

Following methodology outlined in a previous report, time-resolved <sup>1</sup>O<sub>2</sub> phosphorescence traces were fit with an equation that describes <sup>1</sup>O<sub>2</sub> growth and decay kinetics, essentially a parameterized biexponential growth and decay function, which is governed by the kinetic processes that affect <sup>3</sup>CDOM\* and <sup>1</sup>O<sub>2</sub> (eq. S1).<sup>1</sup>

$$[S]_t = \frac{A_0 k_{O_2} [O_2]}{k_d^\Delta - k_{HDA} [HDA] - k_d^T - k_{O_2} [O_2]} \left[ e^{-(k_{O_2} [O_2] + k_{HDA} [HDA] + k_d^T)t} - e^{-(k_d^\Delta)t} \right] \quad S1$$

Rate constants are described in Figure 2a and in the kinetic analysis discussion of the main report.  $A_0$  is the scaling parameter that accounts for instrumental response and <sup>1</sup>O<sub>2</sub> yields from excited triplet states.

$$A_0 = \kappa k_r^\Delta f_\Delta [^3CDOM^*]_0 \quad S2$$

where  $\kappa$  is an instrument response factor,  $k_r^\Delta$  is the <sup>1</sup>O<sub>2</sub> radiative emission rate,  $f_\Delta$  is the fraction of O<sub>2</sub> quenching events that produce <sup>1</sup>O<sub>2</sub>, and  $[^3CDOM^*]_0$  is the initial concentration of <sup>3</sup>CDOM\*. An identical kinetic scheme is valid for model triplet sensitizers. As discussed in the main report, the quenching of <sup>1</sup>O<sub>2</sub> by HDA ( $k_{HDA}^\Delta$ ) is negligible compared to <sup>1</sup>O<sub>2</sub> loss by non-radiative relaxation ( $k_d^\Delta$ ) and is thus omitted from eq. S1.

The overall fitting approach consisted of simultaneously solving for  $A_0$ , which was shared among the different kinetic traces, and  $k_{HDA}$  using the input of rate constants that varied depending on the sensitizer. An exception is  $k_d^\Delta$ , which was fixed at  $2.76 \times 10^5 \text{ s}^{-1}$  for all sensitizers.<sup>2</sup> Generally,  $k_d^T$  values were used from the literature<sup>1, 3, 4</sup> and  $k_{O_2} [O_2]$  values were

determined by fitting the  $^1\text{O}_2$  kinetic trace at  $[\text{HDA}] = 0$ . For CDOM, an average  $k_d^T$  value of  $9 \times 10^4 \text{ s}^{-1}$  was used based on a previous report.<sup>1</sup> Table S1 displays the rate constants used for each sensitizer.

**Table S1** Rate constants used in global kinetic fits for various sensitizers.

| Sensitizer | $k_d^T$ ( $10^4 \text{ s}^{-1}$ ) | $k_{O_2}[\text{O}_2]$ ( $10^6 \text{ s}^{-1}$ ) |
|------------|-----------------------------------|-------------------------------------------------|
| PN         | 1.3                               | 2.39                                            |
| CBBP       | 6.45                              | 1.88                                            |
| CBBP/PN    | 3.88                              | 2.24                                            |
| CDOM       | 9.0                               | 1.14-1.98                                       |

### *Inverse First Order Fitting Approach*

An equation was developed to calculate unquenchable fractions of the  $^1\text{O}_2$  phosphorescence and quenching rate constants of triplets by HDA. Integrating the  $^1\text{O}_2$  phosphorescence signal (eq. S1) yields the area of the  $^1\text{O}_2$  signal, which includes the scaling parameter  $A_0$  (eq. S3):

$$\text{Area} = \frac{A_0 k_{O_2}[\text{O}_2]}{(k_{O_2}[\text{O}_2] + k_d^T + k_{HDA}[\text{HDA}])(k_d^A)} \quad \text{S3}$$

Normalizing the  $^1\text{O}_2$  phosphorescence area ( $S$ ) at a given HDA concentration by the  $^1\text{O}_2$  phosphorescence area at  $[\text{HDA}] = 0$  ( $S_0$ ) yields eq. S4, an inverse first-order equation, which includes a factor  $b$ , which is the ratio of triplet quenching by HDA to other loss pathways (eq. S5):

$$\frac{S}{S_0} = \frac{1-\alpha}{1+b[\text{HDA}]} + \alpha \quad \text{S4}$$

$$b = \frac{k_{HDA}}{k_d^T + k_{O_2}[O_2]} \quad S5$$

where  $\alpha$  represents the fraction of triplets that are not quenched by HDA. Experimentally collected  $^1O_2$  phosphorescence signals were integrated, yielding areas, normalized to the  $^1O_2$  phosphorescence area at  $[HDA] = 0$ , and fit with eq. S4. For CDOM and the CBBP/PN validation mixture,  $^1O_2$  phosphorescence traces were fit with a generalized form of eq. S1, essentially a generic growth and decay biexponential equation (eq. S6), and the resulting fitted curve was used for integration.

$$[S]_t = \frac{A_0 k_{form}}{k_{decay} - k_{form}} (e^{-k_{form}t} - e^{-k_{decay}t}) \quad S6$$

where  $k_{form}$  and  $k_{decay}$  are the  $^1O_2$  phosphorescence signal growth and decay rate constants, respectively. For CBBP/PN experiments, a non-normalized form of eq. S4 was used (eq. S7):

$$S = \frac{(1-\alpha)S_0}{1+b[HDA]} + \alpha S_0 \quad S7$$

with the same parameters as described in the main report. Quenching rate constants of triplets by HDA were calculated by multiplying the fit term  $b$  by the initial growth rate constant of  $^1O_2$  phosphorescence at  $[HDA] = 0$ , which kinetically is  $k_d^T + k_{O_2}[O_2]$ .



## Section 2. Low-Temperature Phosphorescence

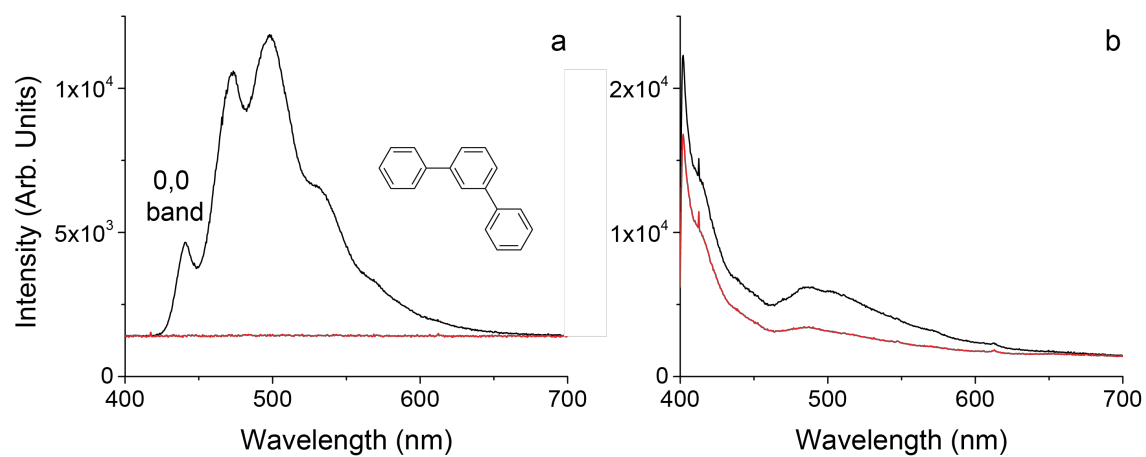

**Figure S1** Low temperature phosphorescence emission spectra for (a) m-terphenyl and (b) EPA solvent blank at 77 (black) and 100 K (red).

**Table S2** Transient absorption spectroscopy experimental details used for measuring quenching rate constants of sensitizer triplets by HDA. Bimolecular rate constants are  $\times 10^9$   $\text{M}^{-1} \text{s}^{-1}$  unless otherwise specified.

| Sensitizer            | Triplet Energy<br>( $\text{kJ mol}^{-1}$ ) <sup>5,6</sup> | Excitation<br>$\lambda$ (nm) | $\lambda$ transient<br>observed (nm) | $k_{\text{HDA}}$            |
|-----------------------|-----------------------------------------------------------|------------------------------|--------------------------------------|-----------------------------|
| 3-Methoxyacetophenone | 303                                                       | 328                          | 433; 438; 444                        | 2.89 ( $\pm 0.10$ )         |
| 4-Benzoylbenzoic acid | 286                                                       | 305                          | 532; 542; 552                        | 1.93 ( $\pm 0.04$ )         |
| 2-Acetonaphthone      | 249                                                       | 328                          | 430; 438; 444                        | 3.15 ( $\pm 0.12$ )         |
| Riboflavin            | 209                                                       | 450                          | 681; 710; 728                        | 0.12 ( $\pm 0.01$ )         |
| Perinaphthenone       | 186                                                       | 380                          | 476; 481; 486                        | $5.3 (\pm 0.6) \times 10^6$ |
| Rose Bengal           | 171                                                       | 552                          | 601; 604; 610                        | $1.8 (\pm 0.3) \times 10^5$ |

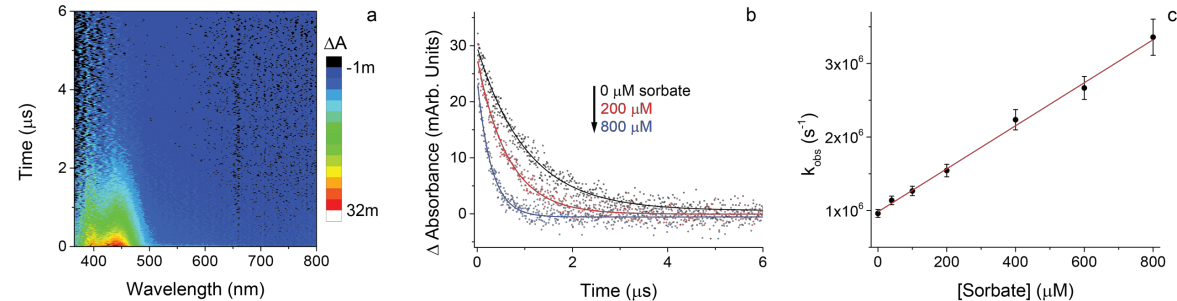

**Figure S2** (a) 3-D transient absorption spectrum for  $^3\text{3MAP}^*$  at  $[\text{HDA}] = 0$ . (b) Kinetic traces for  $^3\text{3MAP}^*$  transient decay monitored at 440 nm under 20%  $\text{O}_2$ -purged conditions with increasing amounts of HDA. (c) Stern-Volmer plot displaying  $^3\text{3MAP}^*$  decay rate constant as a function of added HDA quencher determined from  $^3\text{3MAP}^*$  transient decay monitored at 440 nm (data presented in b).

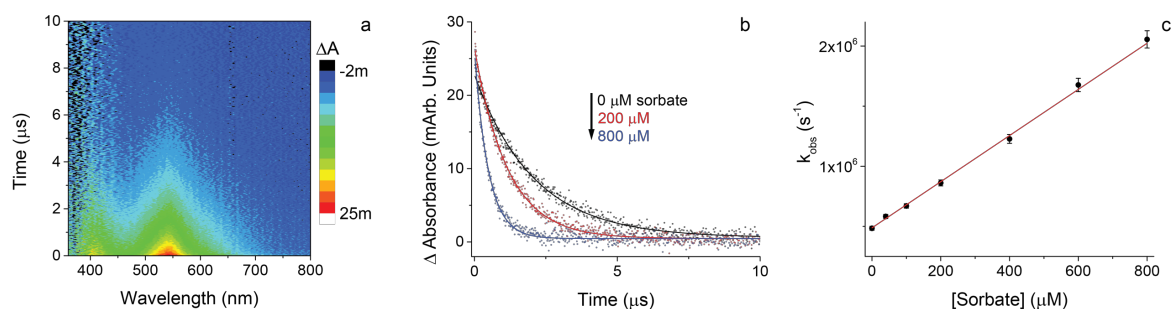

**Figure S3** (a) 3-D transient absorption spectrum for  $^3\text{CBBP}^*$  at  $[\text{HDA}] = 0$ . (b) Kinetic traces for  $^3\text{CBBP}^*$  transient decay monitored at 542 nm under 20%  $\text{O}_2$ -purged conditions with increasing amounts of HDA. (c) Stern-Volmer plot displaying  $^3\text{CBBP}^*$  decay rate constant as a function of added HDA quencher determined from  $^3\text{CBBP}^*$  transient decay monitored at 542 nm (data presented in b).

97

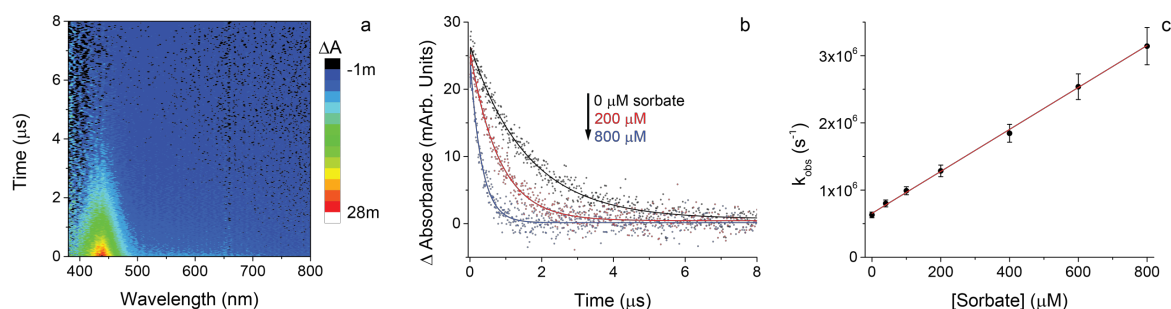

**Figure S4** (a) 3-D transient absorption spectrum for  $^3\text{2AN}^*$  at  $[\text{HDA}] = 0$ . (b) Kinetic traces for  $^3\text{2AN}^*$  transient decay monitored at 438 nm under 20%  $\text{O}_2$ -purged conditions with increasing amounts of HDA. (c) Stern-Volmer plot displaying  $^3\text{2AN}^*$  decay rate constant as a function of added HDA quencher determined from  $^3\text{2AN}^*$  transient decay monitored at 438 nm (data presented in b).

98

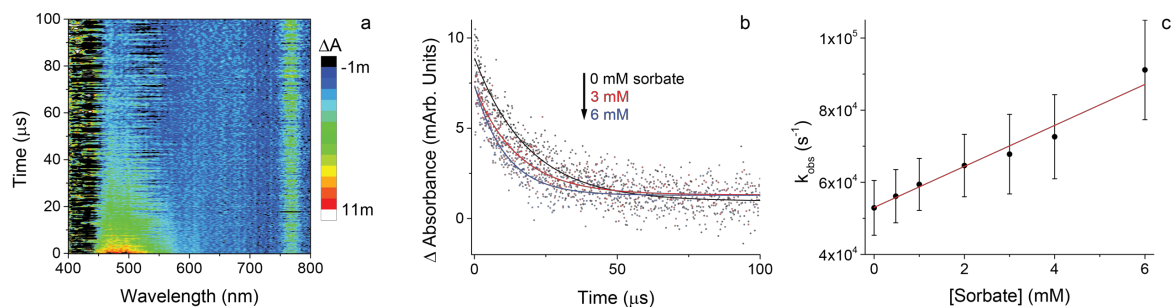

**Figure S5** (a) 3-D transient absorption spectrum for  $^3\text{PN}^*$  at  $[\text{HDA}] = 0$ . (b) Kinetic traces for  $^3\text{PN}^*$  transient decay monitored at 486 nm under  $\text{N}_2\text{O}$ -purged conditions with increasing amounts of HDA. (c) Stern-Volmer plot displaying  $^3\text{PN}^*$  decay rate constant as a function of added HDA quencher determined from  $^3\text{PN}^*$  transient decay monitored at 486 nm (data presented in b).

99

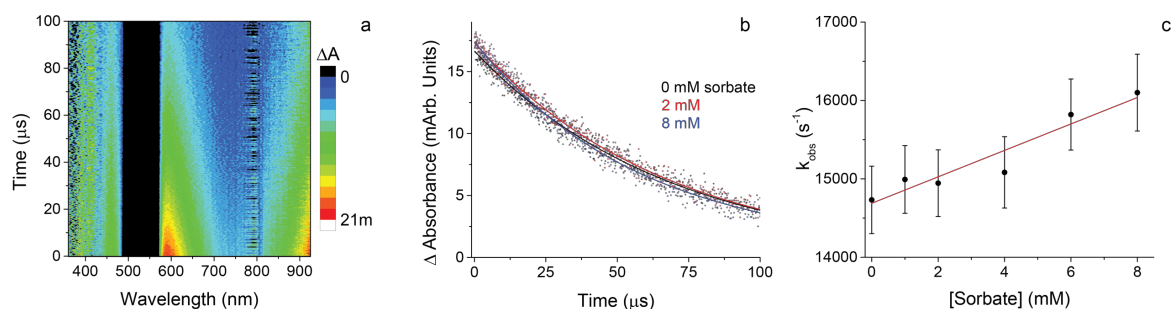

**Figure S6** (a) 3-D transient absorption spectrum for  $^3\text{RB}^*$  at  $[\text{HDA}] = 0$ . (b) Kinetic traces for  $^3\text{RB}^*$  transient decay monitored at 601 nm under Ar-purged conditions with increasing amounts of HDA. (c) Stern-Volmer plot displaying  $^3\text{RB}^*$  decay rate constant as a function of added HDA quencher determined from  $^3\text{RB}^*$  transient decay monitored at 601 nm (data presented in b).

100

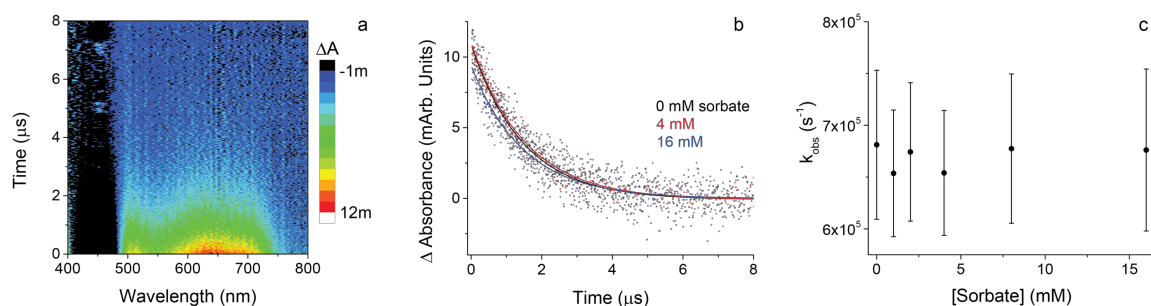

**Figure S7** (a) 3-D transient absorption spectrum for  $^3\text{riboflavin}^*$  in methanol at  $[\text{HDA}] = 0$ . (b) Kinetic traces for  $^3\text{riboflavin}^*$  transient decay monitored at 650 nm under 5%  $\text{O}_2$ -purged conditions with increasing amounts of HDA. (c) Stern-Volmer plot displaying  $^3\text{riboflavin}^*$  decay rate constant as a function of added HDA quencher determined from  $^3\text{riboflavin}^*$  transient decay monitored at 650 nm (data presented in b).

101

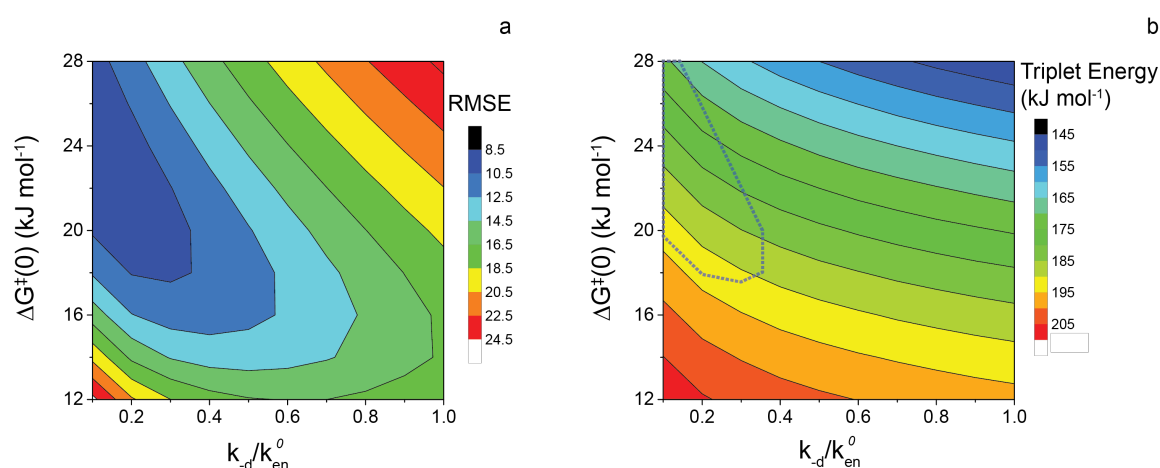

**Figure S8** Contour plots showing (a) RMSE of fits and (b) calculated triplet energy based on the parameters  $\Delta G^\ddagger(0)$  and  $k_d/k_{en}^0$  used to fit the quenching of model sensitizer triplets by HDA with eq. 1. The dashed-line in panel b represents the parameter range that yielded RMSE less than 10.5 that was used to calculate the average triplet energy of HDA.

102

103

## Section 4. Sorbic Acid Quenching of Model Sensitizer Triplets

### Screening Factor for CBBP/PN Sensitizer Mixture

A screening factor ( $S_\lambda$ ) was applied to the unquenchable  $^1\text{O}_2$  phosphorescence signal area produced by the CBBP/PN mixture to account for light screening by CBBP using eq. S8:

$$S_\lambda = \frac{1 - 10^{-l \times \alpha_\lambda}}{2.303 \times l \times \alpha_\lambda} \quad \text{S8}$$

where  $\alpha_\lambda$  is the solution absorbance ( $\text{cm}^{-1}$ ) and  $l$  the experimental path length (cm).

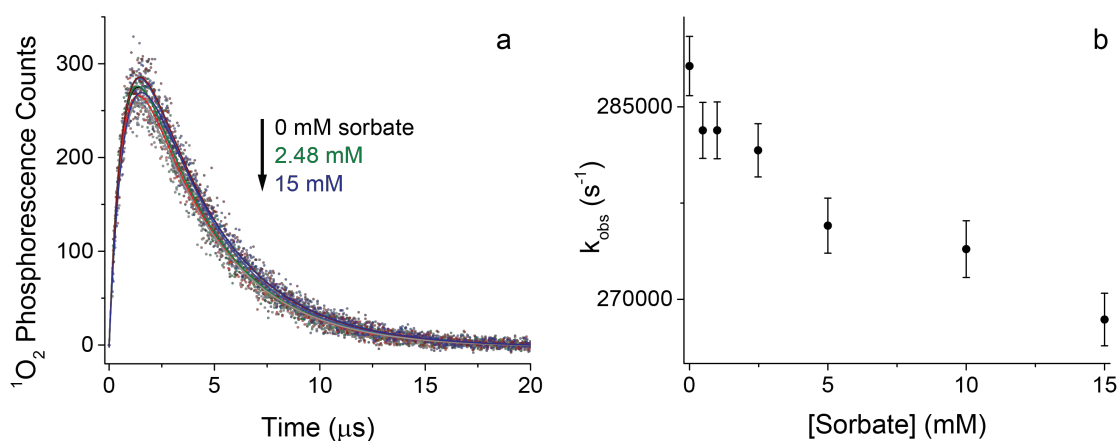

**Figure S9** (a) Time-resolved  $^1\text{O}_2$  phosphorescence traces for ZnTMPyP ( $\lambda_{\text{ex}} = 450 \text{ nm}$ ) as a function of added HDA. Solid lines are the generic biexponential kinetic fits described in the text. (b) Decay rate constants of the biexponential fits in panel a, plotted as a function of [HDA].

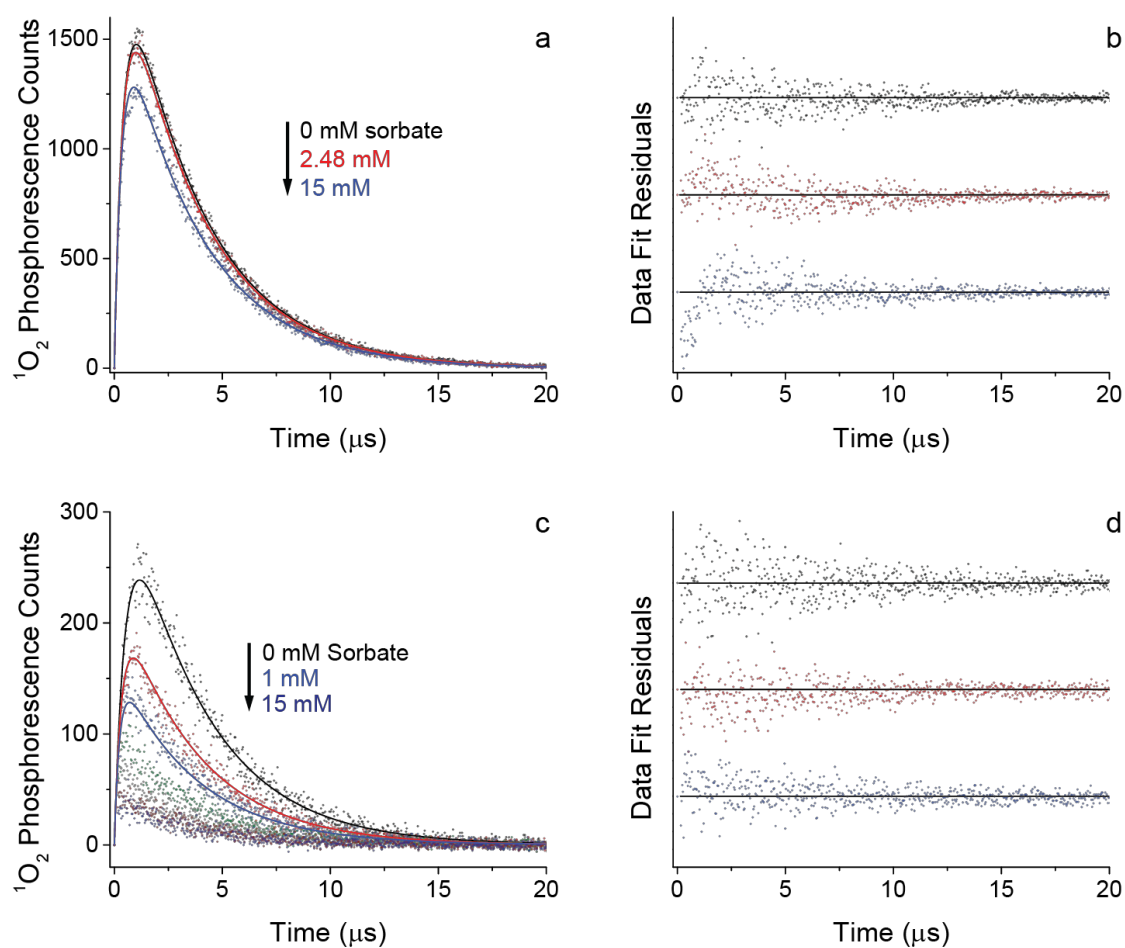

**Figure S10** Time-resolved  $^1\text{O}_2$  phosphorescence traces for (a) PN ( $\lambda_{\text{ex}} = 340 \text{ nm}$ ) and (c) CBBP ( $\lambda_{\text{ex}} = 340 \text{ nm}$ ) as a function of added HDA. Solid lines are the global kinetic fits as described in the text with associated residuals – displayed adjacent to the fits – in panels b and d.

115

116

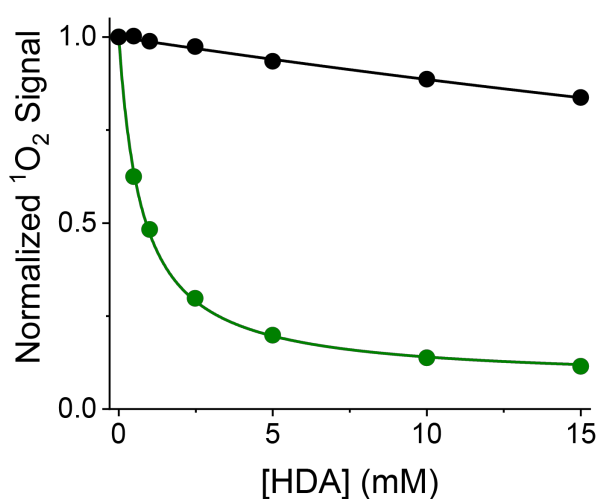

**Figure S11** Normalized  $^1\text{O}_2$  phosphorescence signal areas as a function of added HDA for PN (black) and CBBP (green). Solid lines are the inverse first order fits described in the text.

117

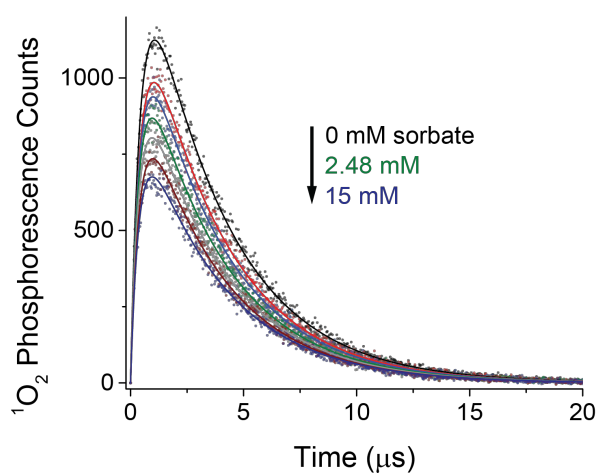

**Figure S12** Time-resolved  $^1\text{O}_2$  phosphorescence traces for CBBP/ PN mixture ( $\lambda_{\text{ex}} = 340$  nm) as a function of added HDA. Solid lines are the generic biexponential kinetic fits described in the text.

118



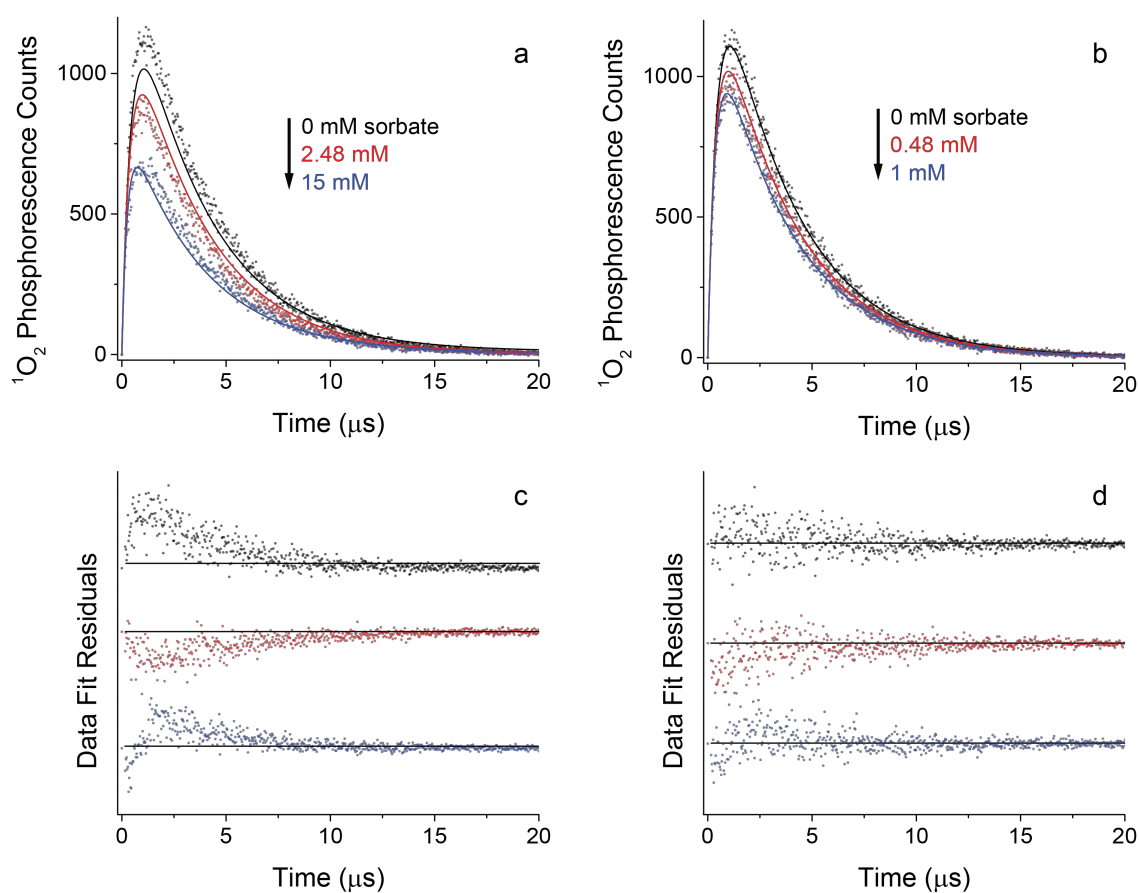

**Figure S13** Time-resolved  $^1\text{O}_2$  phosphorescence traces for CBBP/PN mixture ( $\lambda_{\text{ex}} = 340$  nm) as a function of added HDA fit at (a) high and (b) low [HDA]. Solid lines are the global kinetic fits described in the text. Residuals of global kinetic fits at (c) high and (d) low [HDA].

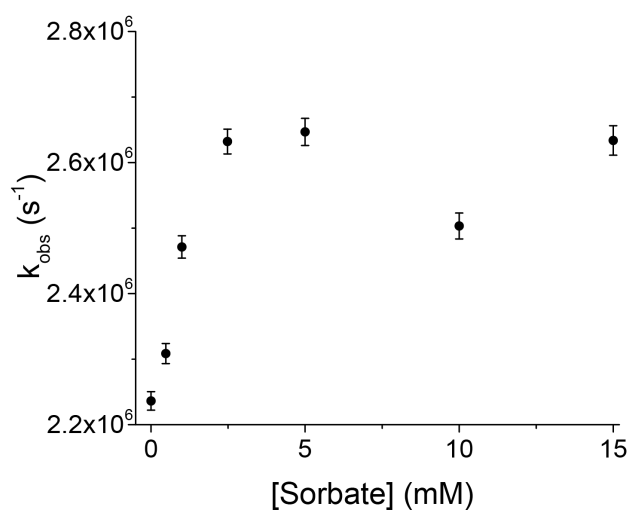

**Figure S14**  $^1O_2$  phosphorescence growth rate constant ( $k_{obs}$ ) produced by CBBP/ PN mixture ( $\lambda_{ex} = 340$  nm) as a function of HDA quencher.  $k_{obs}$  was calculated using a generic growth and decay equation.

120  
121  
122  
123  
124  
125  
126  
127  
128  
129  
130  
131

## Section 5. Sorbic Acid Quenching of $^3\text{CDOM}^*$

### *Reproducibility of Quenching Experiments*

Reproducibility of the measured rate constants was assessed by repeating HDA quenching experiments of MRNOM in triplicate. The resulting values were quite similar ( $3.0 \pm 0.1$ ,  $2.8 \pm 0.1$ , and  $2.8 \pm 0.1 \times 10^8 \text{ M}^{-1} \text{ s}^{-1}$ ) with a standard deviation of less than 5% between the values.

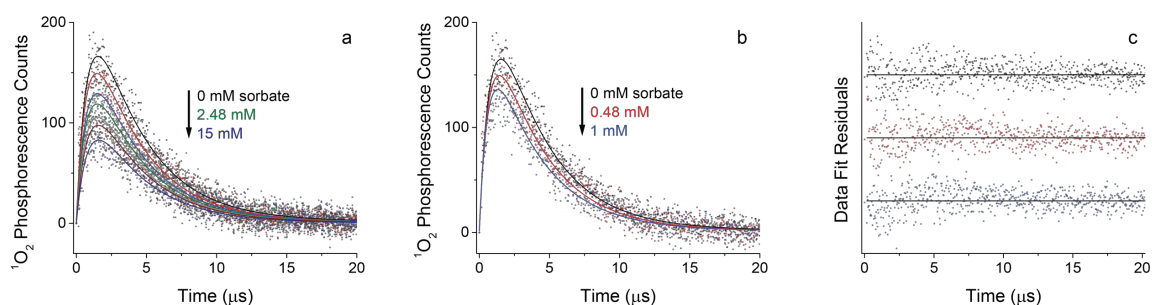

**Figure S15** Time-resolved  $^1\text{O}_2$  phosphorescence traces for SRNOM as a function of added HDA with (a) generic biexponential growth and decay and (b) global kinetic fitting. (c) Residuals of global kinetic fits from associated traces in panel b.

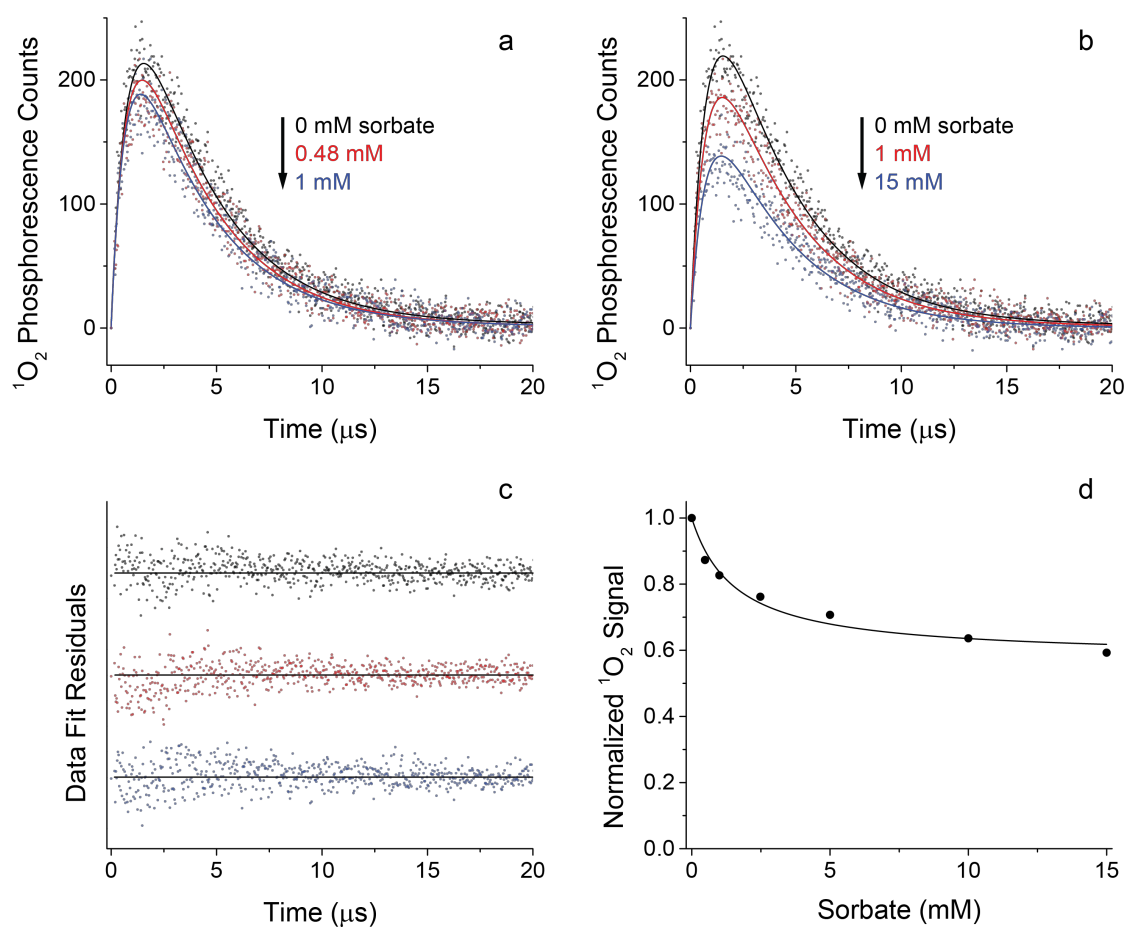

**Figure S16** Time-resolved  $^1\text{O}_2$  phosphorescence traces for SRFA as a function of added HDA with (a) global kinetic and (b) generic biexponential growth and decay fitting. (c) Residuals of global kinetic fits from associated traces in panel a. (d) Normalized  $^1\text{O}_2$  phosphorescence signal area as a function of added HDA from data in panel b. Solid line is the inverse first order fit.

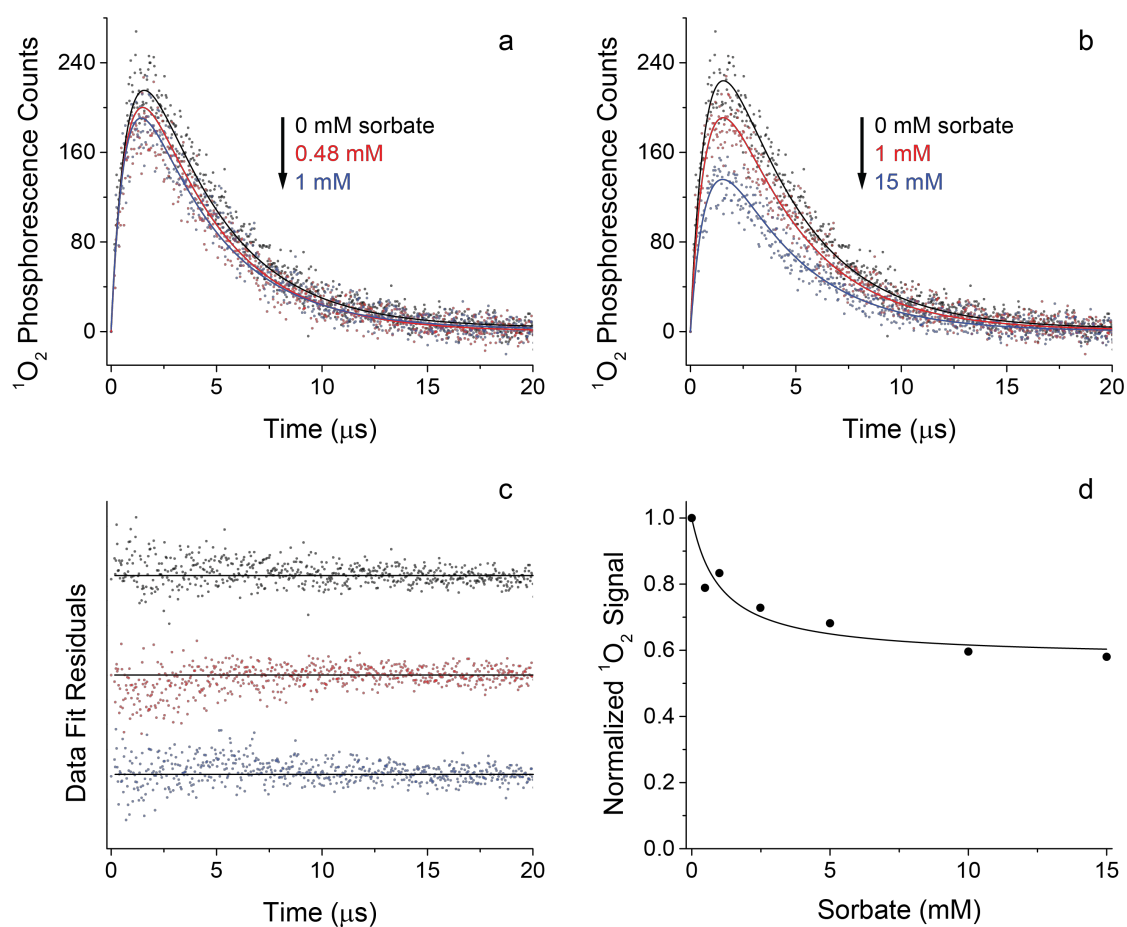

**Figure S17** Time-resolved  $^1\text{O}_2$  phosphorescence traces for Great Dismal Swamp whole water as a function of added HDA with (a) global kinetic and (b) generic biexponential growth and decay fitting. (c) Residuals of global kinetic fits from associated traces in panel a. (d) Normalized  $^1\text{O}_2$  phosphorescence signal area as a function of added HDA from data in panel b. Solid line is the inverse first order fit.

142

143

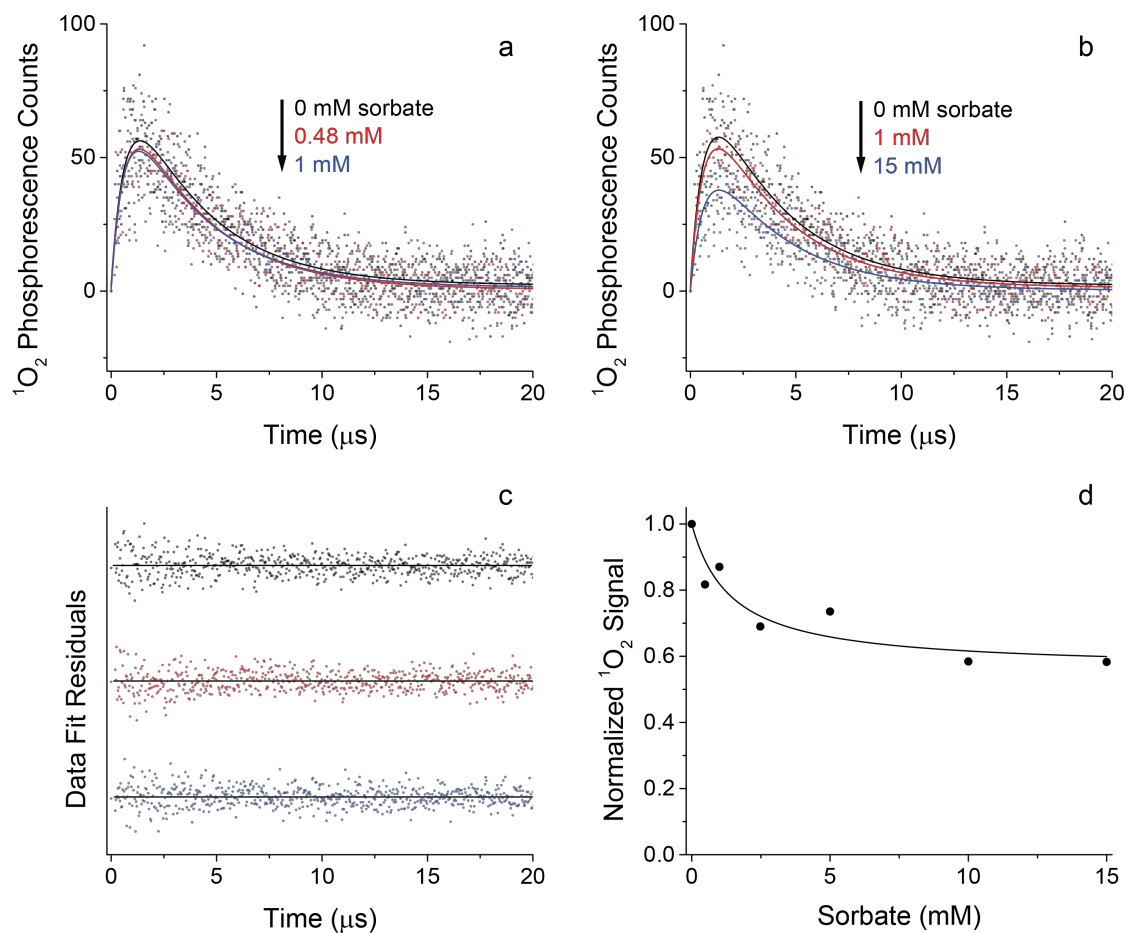

**Figure S18** Time-resolved  $^1\text{O}_2$  phosphorescence traces for SRHA as a function of added HDA with (a) global kinetic and (b) generic biexponential growth and decay fitting. (c) Residuals of global kinetic fits from associated traces in panel a. (d) Normalized  $^1\text{O}_2$  phosphorescence signal area as a function of added HDA from data in panel b. Solid line is the inverse first order fit.

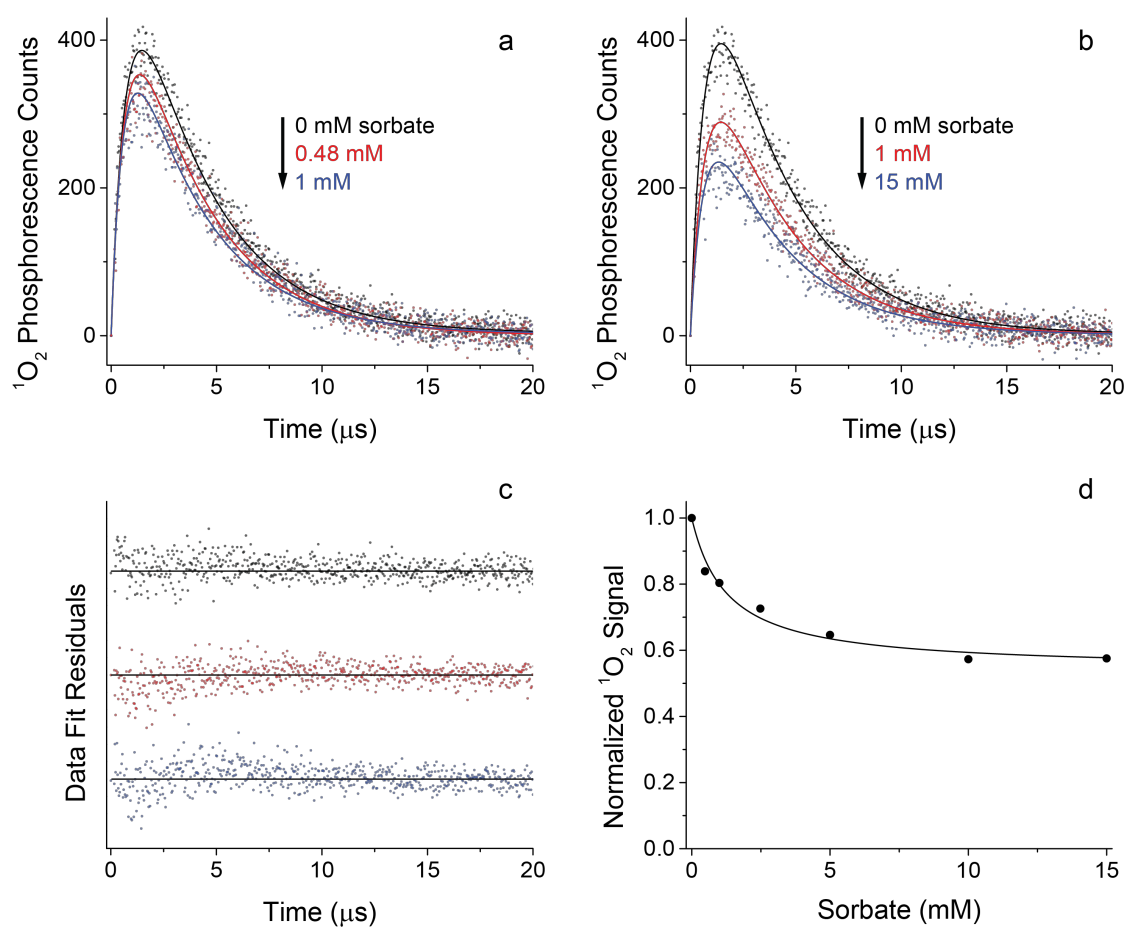

**Figure S19** Time-resolved  $^1\text{O}_2$  phosphorescence traces for Nordic Lake NOM as a function of added HDA with (a) global kinetic and (b) generic biexponential growth and decay fitting. (c) Residuals of global kinetic fits from associated traces in panel a. (d) Normalized  $^1\text{O}_2$  phosphorescence signal area as a function of added HDA from data in panel b. Solid line is the inverse first order fit.

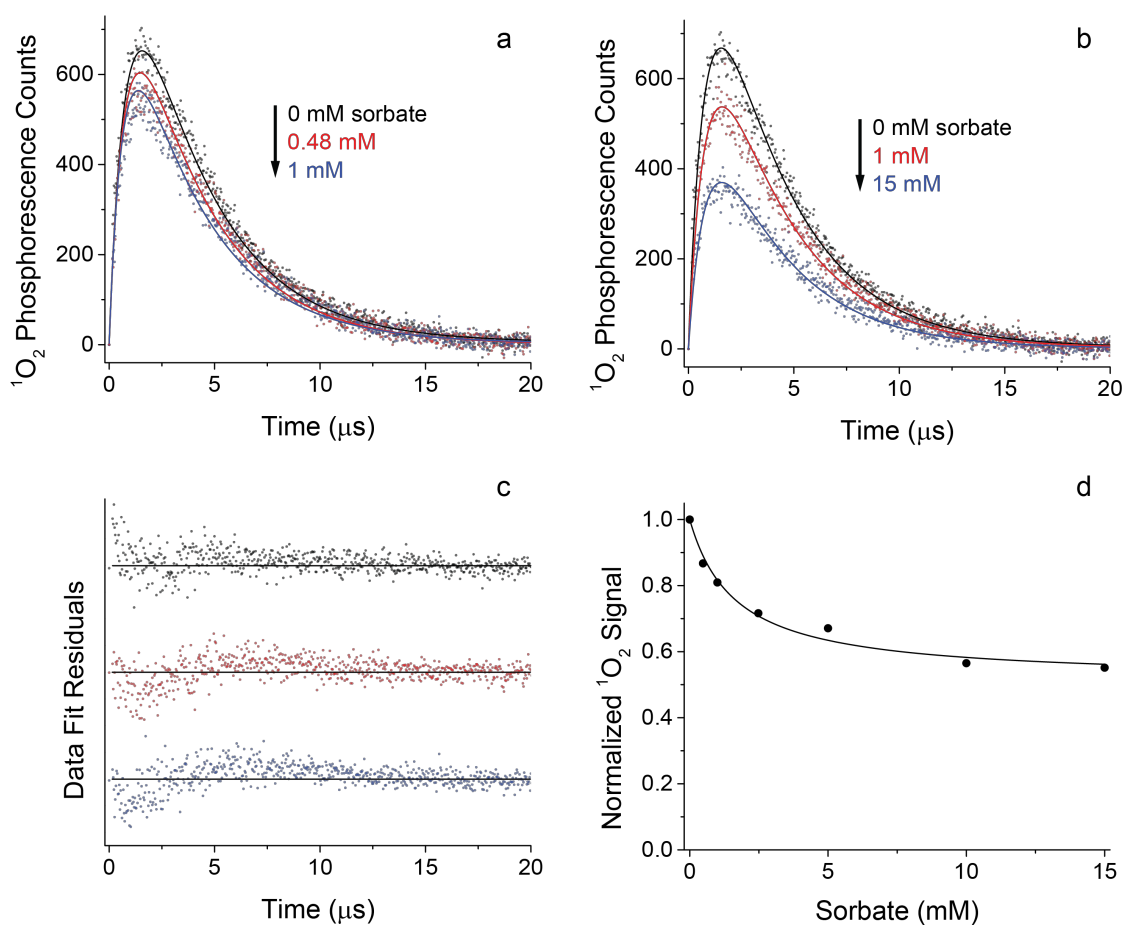

**Figure S20** Time-resolved  $^1\text{O}_2$  phosphorescence traces for Everglades TPIA as a function of added HDA with (a) global kinetic and (b) generic biexponential growth and decay fitting. (c) Residuals of global kinetic fits from associated traces in panel a. (d) Normalized  $^1\text{O}_2$  phosphorescence signal area as a function of added HDA from data in panel b. Solid line is the inverse first order fit.



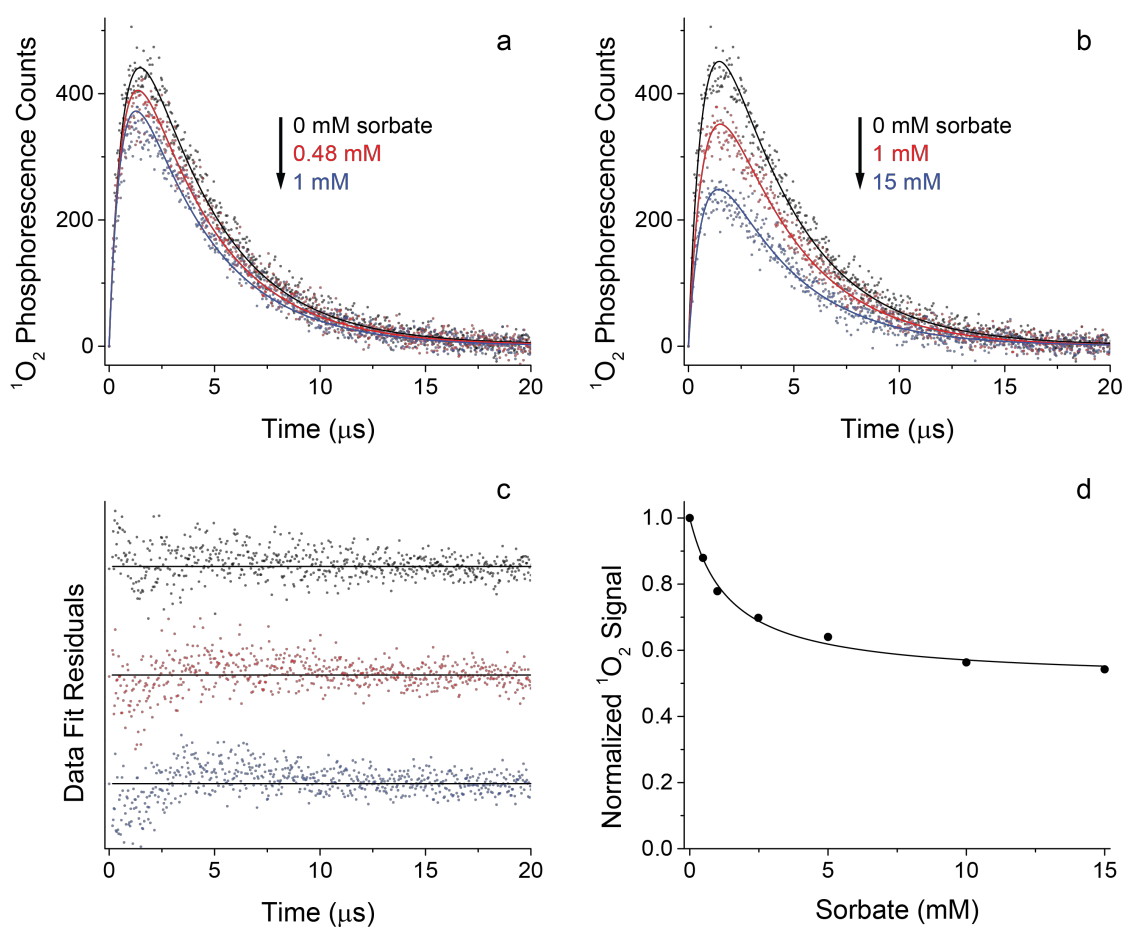

**Figure S21** Time-resolved  $^1\text{O}_2$  phosphorescence traces for Everglades HPOA as a function of added HDA with (a) global kinetic and (b) generic biexponential growth and decay fitting. (c) Residuals of global kinetic fits from associated traces in panel a. (d) Normalized  $^1\text{O}_2$  phosphorescence signal area as a function of added HDA from data in panel b. Solid line is the inverse first order fit.

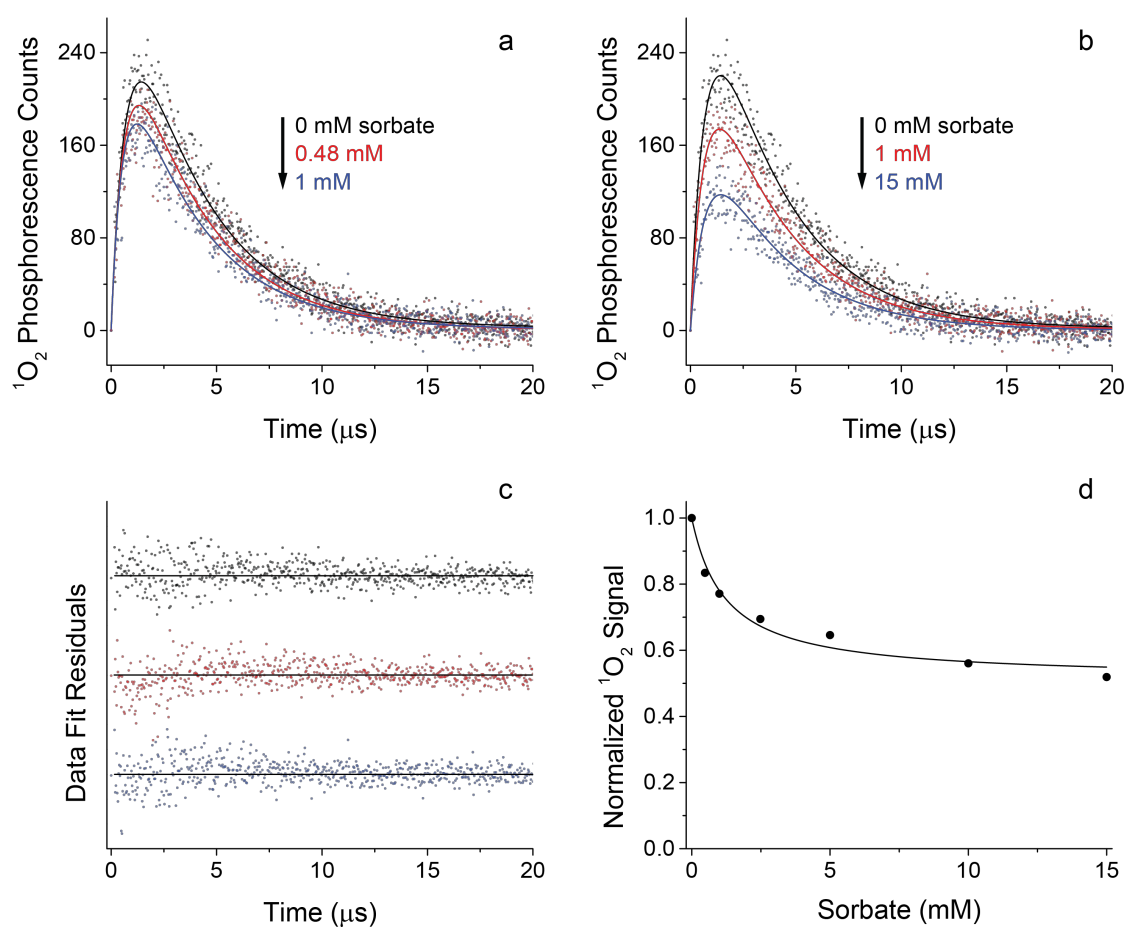

**Figure S22** Time-resolved  $^1\text{O}_2$  phosphorescence traces for Lake Bradford whole water as a function of added HDA with (a) global kinetic and (b) generic biexponential growth and decay fitting. (c) Residuals of global kinetic fits from associated traces in panel a. (d) Normalized  $^1\text{O}_2$  phosphorescence signal area as a function of added HDA from data in panel b. Solid line is the inverse first order fit.

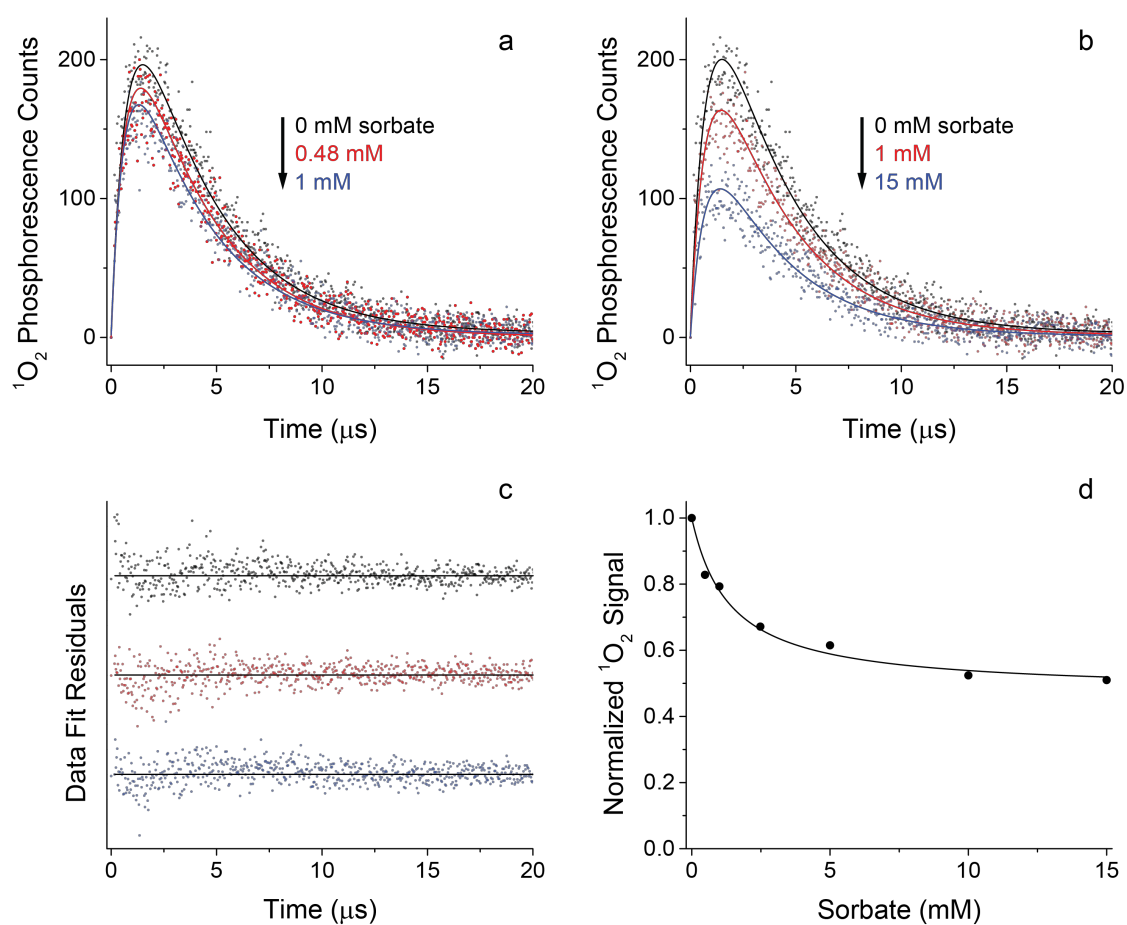

**Figure S23** Time-resolved  $^1\text{O}_2$  phosphorescence traces for Mississippi River NOM as a function of added HDA with (a) global kinetic and (b) generic biexponential growth and decay fitting. (c) Residuals of global kinetic fits from associated traces in panel a. (d) Normalized  $^1\text{O}_2$  phosphorescence signal area as a function of added HDA from data in panel b. Solid line is the inverse first order fit.

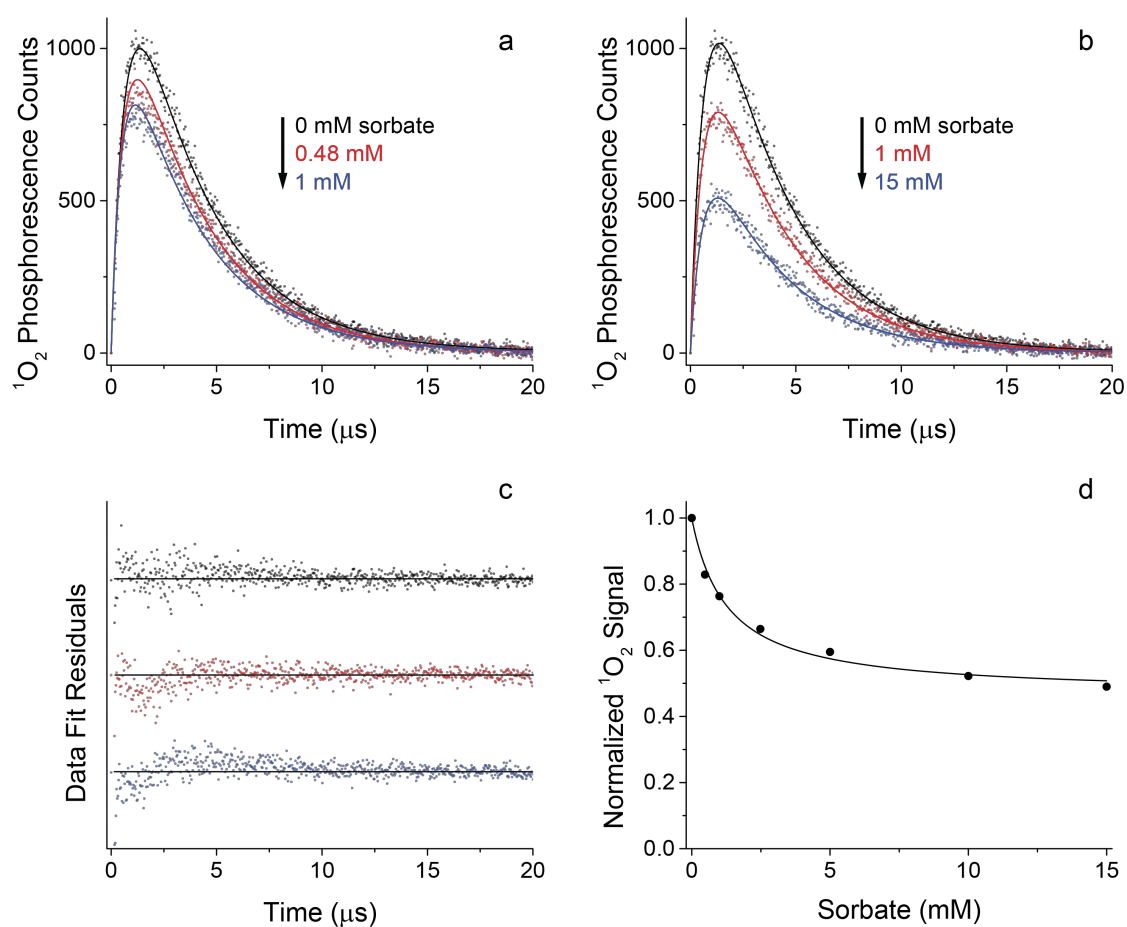

**Figure S24** Time-resolved  $^1\text{O}_2$  phosphorescence traces for Everglades HPON as a function of added HDA with (a) global kinetic and (b) generic biexponential growth and decay fitting. (c) Residuals of global kinetic fits from associated traces in panel a. (d) Normalized  $^1\text{O}_2$  phosphorescence signal area as a function of added HDA from data in panel b. Solid line is the inverse first order fit.

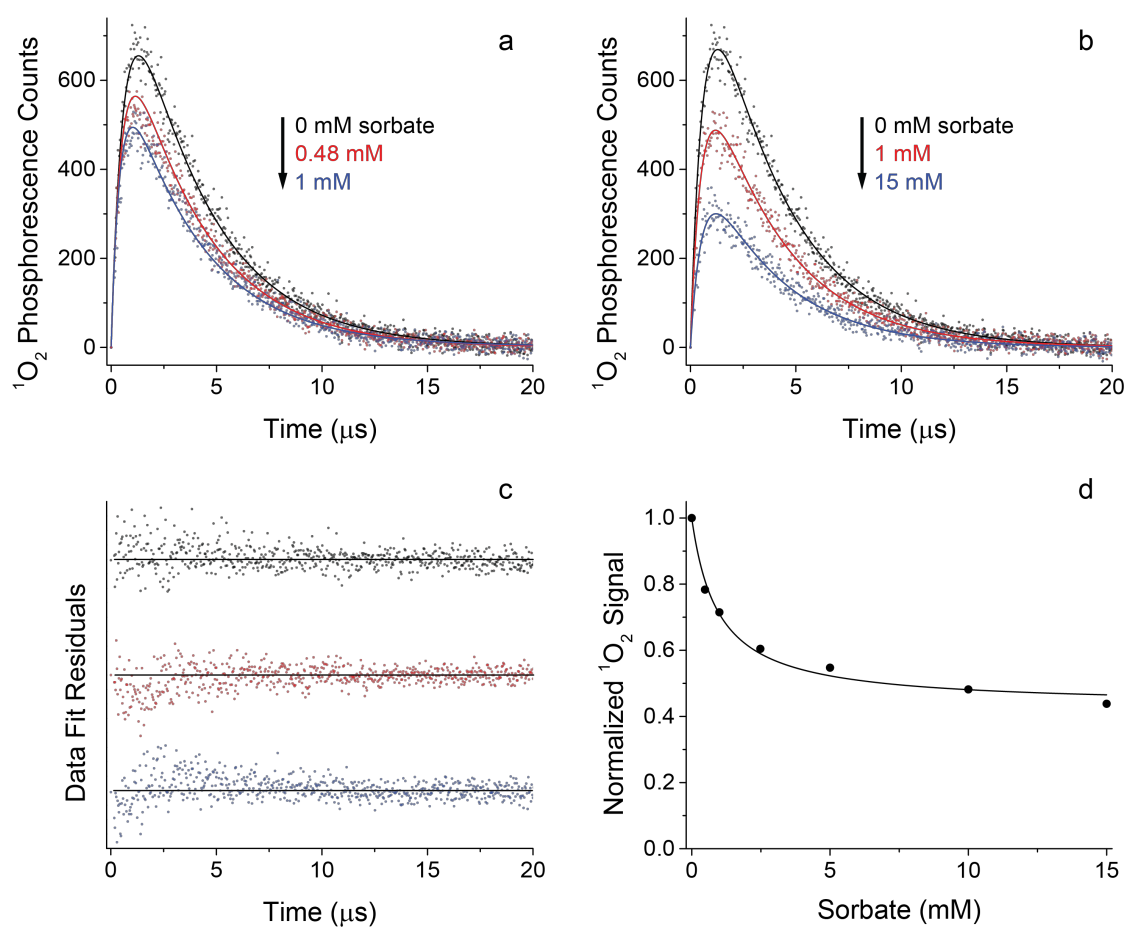

**Figure S25** Time-resolved  $^1\text{O}_2$  phosphorescence traces for Williams Lake HPON as a function of added HDA with (a) global kinetic and (b) generic biexponential growth and decay fitting. (c) Residuals of global kinetic fits from associated traces in panel a. (d) Normalized  $^1\text{O}_2$  phosphorescence signal area as a function of added HDA from data in panel b. Solid line is the inverse first order fit.

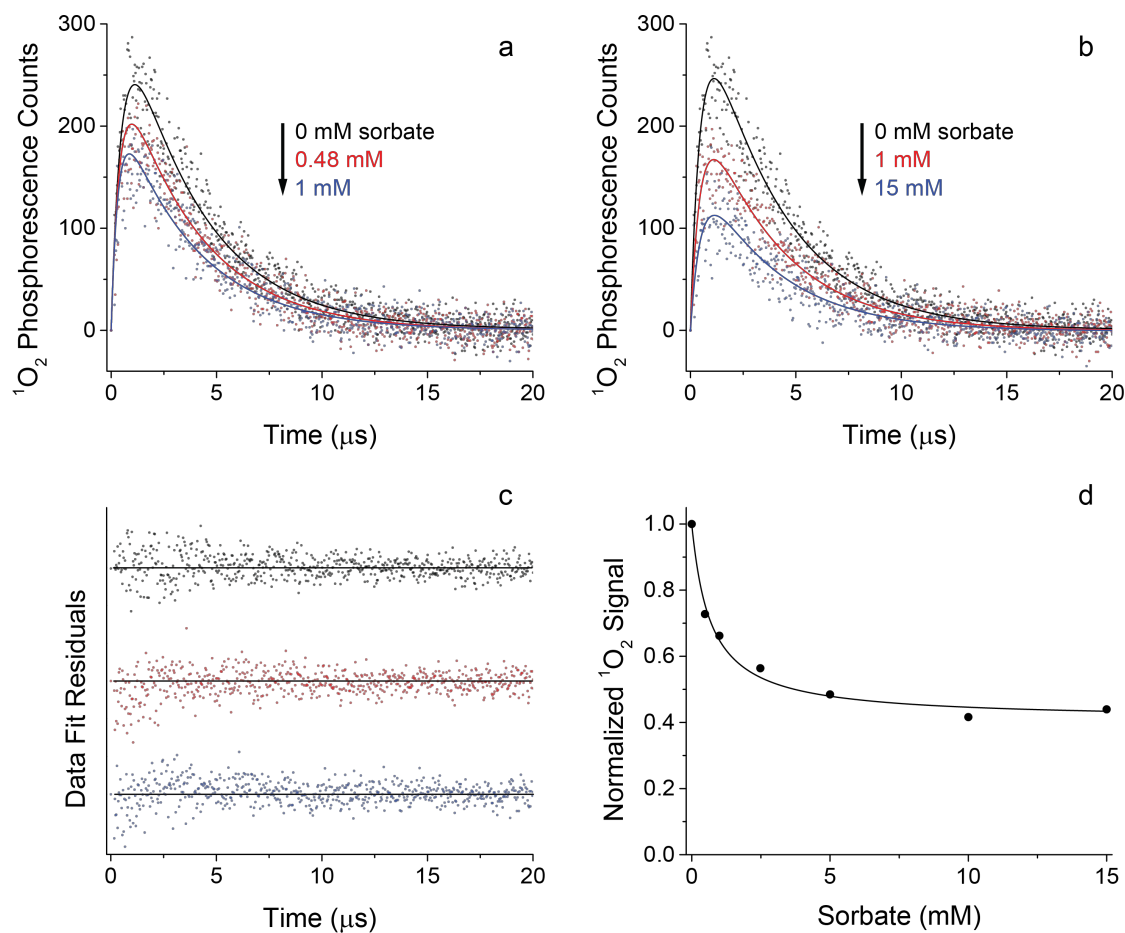

**Figure S26** Time-resolved  $^1\text{O}_2$  phosphorescence traces for Pacific Ocean HPOA as a function of added HDA with (a) global kinetic and (b) generic biexponential growth and decay fitting. (c) Residuals of global kinetic fits from associated traces in panel a. (d) Normalized  $^1\text{O}_2$  phosphorescence signal area as a function of added HDA from data in panel b. Solid line is the inverse first order fit.

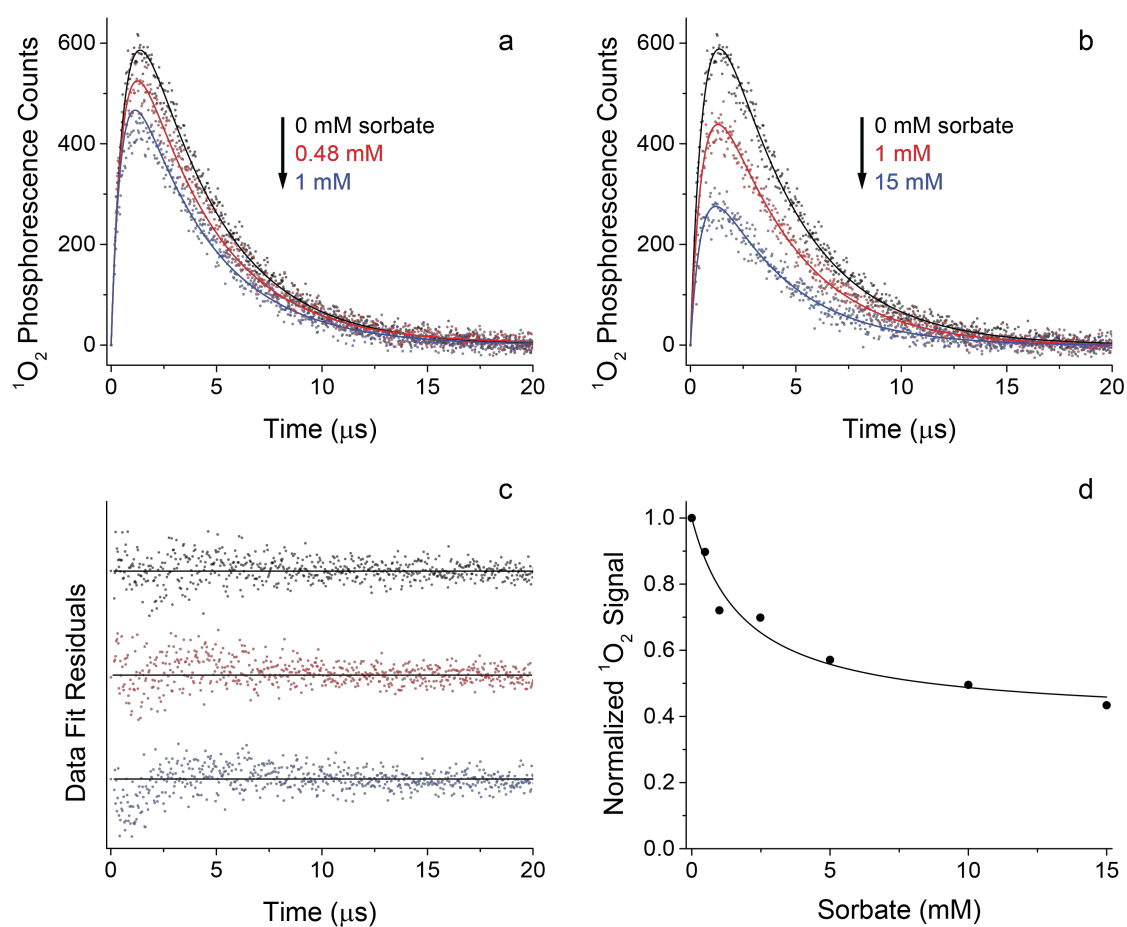

**Figure S27** Time-resolved  $^1\text{O}_2$  phosphorescence traces for Williams Lake HPOA as a function of added HDA with (a) global kinetic and (b) generic biexponential growth and decay fitting. (c) Residuals of global kinetic fits from associated traces in panel a. (d) Normalized  $^1\text{O}_2$  phosphorescence signal area as a function of added HDA from data in panel b. Solid line is the inverse first order fit.

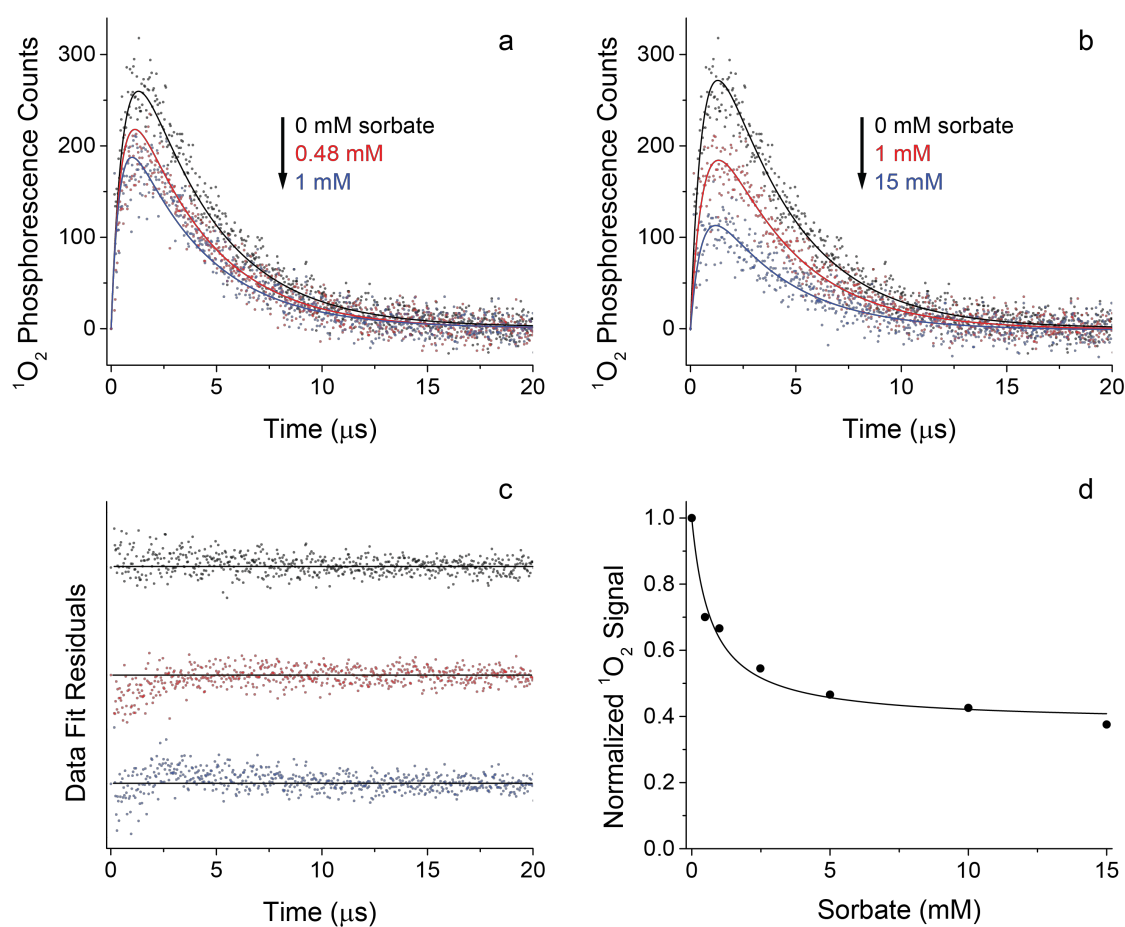

**Figure S28** Time-resolved  $^1\text{O}_2$  phosphorescence traces for Williams Lake TPIA as a function of added HDA with (a) global kinetic and (b) generic biexponential growth and decay fitting. (c) Residuals of global kinetic fits from associated traces in panel a. (d) Normalized  $^1\text{O}_2$  phosphorescence signal area as a function of added HDA from data in panel b. Solid line is the inverse first order fit.



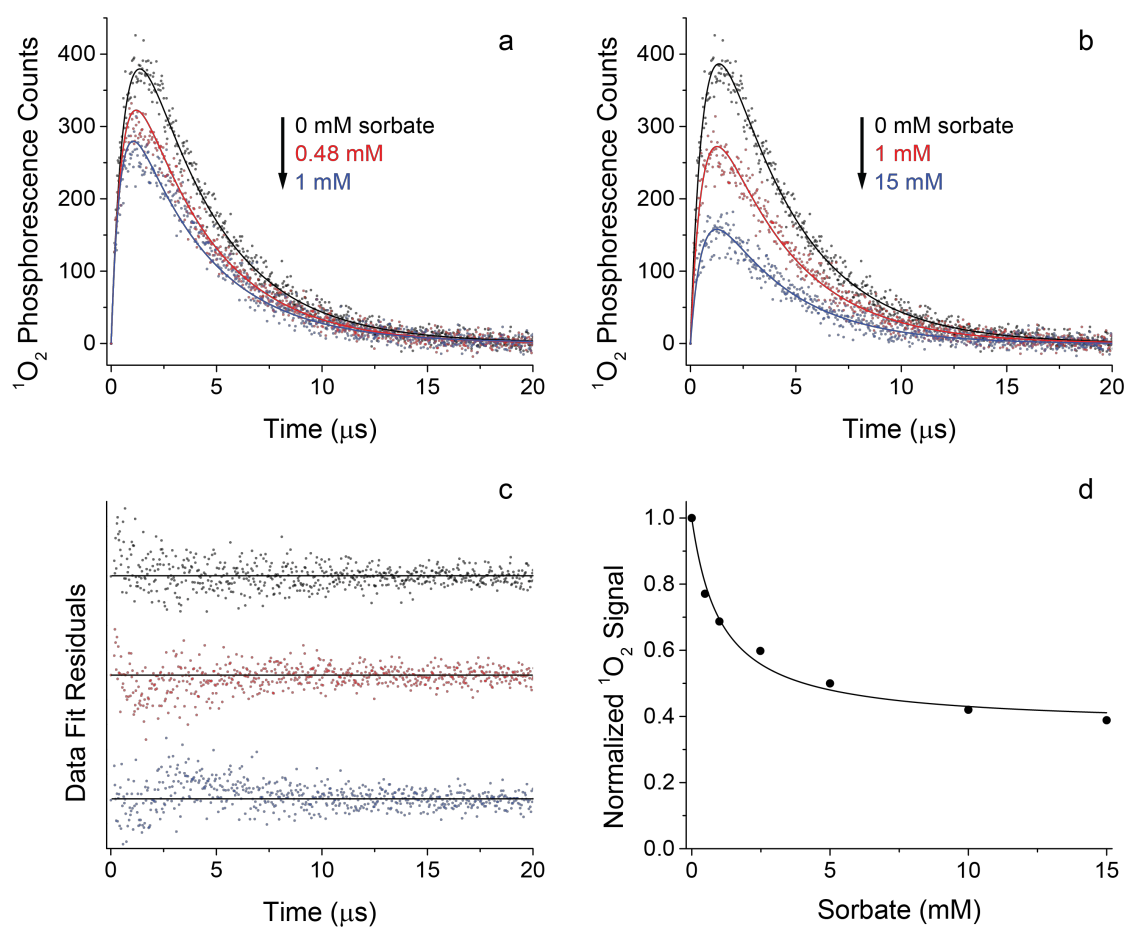

**Figure S29** Time-resolved  $^1\text{O}_2$  phosphorescence traces for Pony Lake FA as a function of added HDA with (a) global kinetic and (b) generic biexponential growth and decay fitting. (c) Residuals of global kinetic fits from associated traces in panel a. (d) Normalized  $^1\text{O}_2$  phosphorescence signal area as a function of added HDA from data in panel b. Solid line is the inverse first order fit.

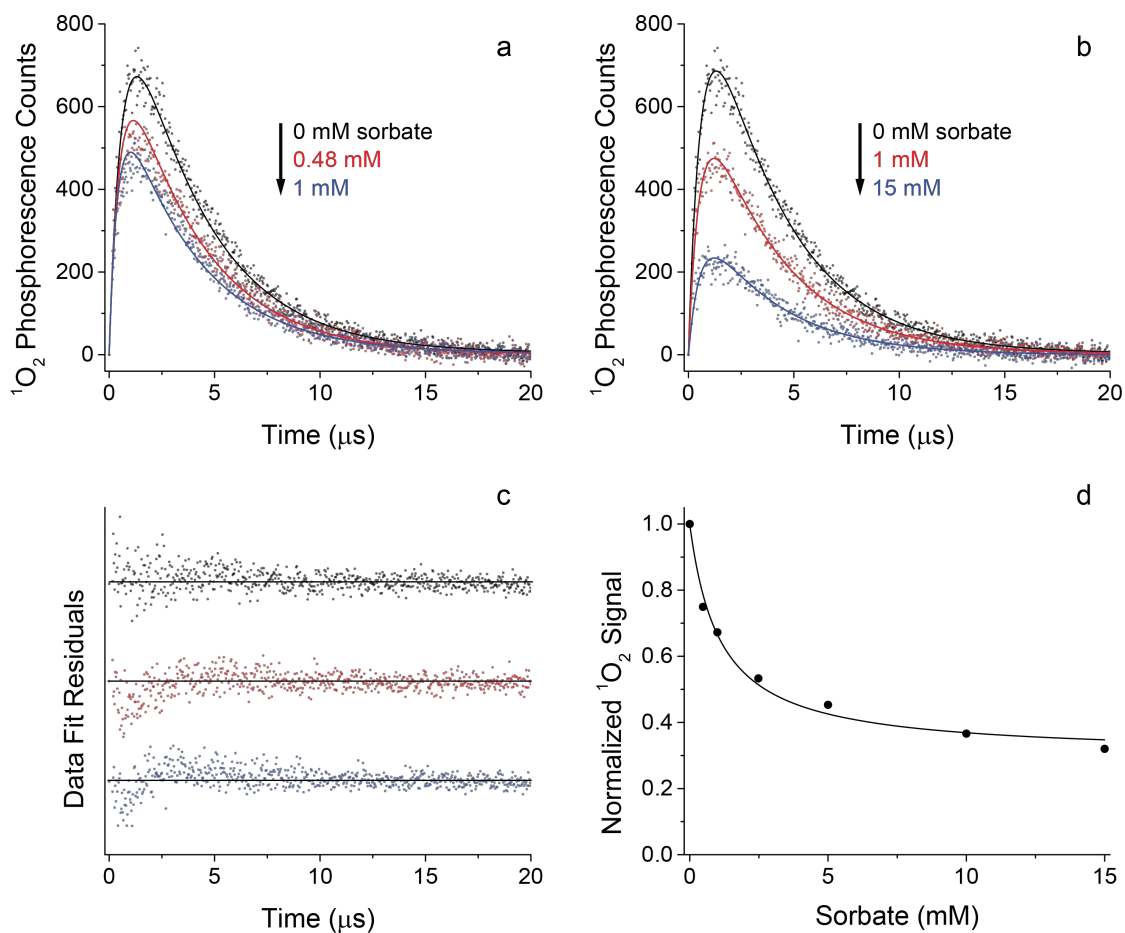

**Figure S30** Time-resolved  $^1\text{O}_2$  phosphorescence traces for Lake Fryxell FA as a function of added HDA with (a) global kinetic and (b) generic biexponential growth and decay fitting. (c) Residuals of global kinetic fits from associated traces in panel a. (d) Normalized  $^1\text{O}_2$  phosphorescence signal area as a function of added HDA from data in panel b. Solid line is the inverse first order fit.

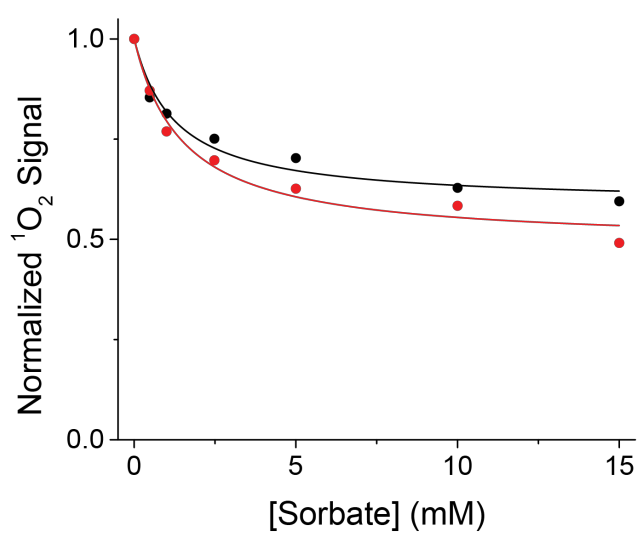

**Figure S31** Normalized  $^1\text{O}_2$  phosphorescence signal area as a function of added HDA for SRNOM in methanol (black) and water (red). Solid lines are the inverse first order fits.

157

158

## Section 6. Comparing $k_{HDA}$ from Single Pool and Two-Pool Fitting Approaches

To compare  $k_{HDA}$  values determined from the single pool and two-pool fitting approaches, a  $k_{HDA}$  value for all triplets in CDOM ( $k_{AVG}$ ) was calculated using eq. S9:

$$k_{AVG} = \alpha_{low}k_{low} + (1 - \alpha_{low})k_{high} \quad S9$$

where  $\alpha_{low}$  is the unquenchable fraction determined from the two-pool fitting approach,  $k_{low}$  is  $k_{HDA}$  for the low energy triplet pool (assumed to equal 0), and  $k_{high}$  is  $k_{HDA}$  for the high energy triplet pool determined from the two-pool fitting approach. Calculated  $k_{AVG}$  values are compared to  $k_{HDA}$  values determined with the single pool fitting approach in Table S3.

**Table S3** Rate constants of HDA quenching of  $^3\text{CDOM}^*$  for various DOM sources determined with eq. S8 ( $k_{AVG}$ ) and global kinetic fitting ( $k_{HDA}$ ).

| DOM                   | $k_{AVG}$ ( $10^8 \text{ M}^{-1} \text{ s}^{-1}$ ) | $k_{HDA}$ ( $10^8 \text{ M}^{-1} \text{ s}^{-1}$ )<br>Global Kinetic |
|-----------------------|----------------------------------------------------|----------------------------------------------------------------------|
| Suwannee River FA     | 3.4 ( $\pm 0.8$ )                                  | 2.2 ( $\pm 0.1$ )                                                    |
| Great Dismal Swamp    | 5.0 ( $\pm 2.0$ )                                  | 2.1 ( $\pm 0.1$ )                                                    |
| Suwannee River HA     | 4.9 ( $\pm 2.4$ )                                  | 1.2 ( $\pm 0.4$ )                                                    |
| Nordic Lake NOM       | 5.0 ( $\pm 1.0$ )                                  | 3.3 ( $\pm 0.1$ )                                                    |
| Everglades TPIA       | 3.7 ( $\pm 0.7$ )                                  | 2.6 ( $\pm 0.1$ )                                                    |
| Everglades HPOA       | 4.7 ( $\pm 0.7$ )                                  | 3.3 ( $\pm 0.1$ )                                                    |
| Lake Bradford         | 5.7 ( $\pm 1.3$ )                                  | 3.8 ( $\pm 0.1$ )                                                    |
| Mississippi River NOM | 3.7 ( $\pm 0.9$ )                                  | 2.9 ( $\pm 0.1$ )                                                    |
| Suwannee River NOM    | 4.3 ( $\pm 1.0$ )                                  | 3.6 ( $\pm 0.1$ )                                                    |
| Everglades HPON       | 6.4 ( $\pm 1.0$ )                                  | 4.6 ( $\pm 0.1$ )                                                    |

|                    |                    |                    |
|--------------------|--------------------|--------------------|
| Williams Lake HPON | 9.9 ( $\pm 1.6$ )  | 7.2 ( $\pm 0.1$ )  |
| Pacific Ocean HPOA | 17.9 ( $\pm 3.0$ ) | 10.2 ( $\pm 0.3$ ) |
| Williams Lake HPOA | 4.9 ( $\pm 1.3$ )  | 5.3 ( $\pm 0.1$ )  |
| Williams Lake TPIA | 14.5 ( $\pm 3.0$ ) | 8.2 ( $\pm 0.2$ )  |
| Pony Lake FA       | 9.2 ( $\pm 1.6$ )  | 7.4 ( $\pm 0.1$ )  |
| Lake Fryxell FA    | 10.4 ( $\pm 1.6$ ) | 8.0 ( $\pm 0.1$ )  |

171

172

173

174

175

176

177

## Section 7. Past Estimates of Triplet Distribution in CDOM

**Table S4** Data from Zepp et al.<sup>7</sup> updated using an assumed  $f_{\Delta}$  value of 0.95 and a revised  $k_{O_2}$  value for  $^3\text{CDOM}^*(9 \times 10^8 \text{ M}^{-1} \text{ s}^{-1})$ ,<sup>1,8</sup> which affects the calculation of  $[^3\text{CDOM}^*] > 94 \text{ kJ mol}^{-1}$  and thus impacts  $\alpha$ .

| Water Sample           | $[^1\text{O}_2]$<br>( $10^{-13} \text{ M}$ ) | $[^3\text{CDOM}^*]$<br>> 94 kJ mol <sup>-1</sup><br>( $10^{-13} \text{ M}$ ) | $[^3\text{CDOM}^*]$<br>> 250 kJ mol <sup>-1</sup><br>( $10^{-13} \text{ M}$ ) | $\alpha$ |
|------------------------|----------------------------------------------|------------------------------------------------------------------------------|-------------------------------------------------------------------------------|----------|
| Aucilla River          | 4.4                                          | 5.7                                                                          | 1.0                                                                           | 0.82     |
| Suwannee River         | 4.1                                          | 5.3                                                                          | 0.7                                                                           | 0.87     |
| Wylde Lake humus       | 2.5                                          | 3.2                                                                          | 0.4                                                                           | 0.89     |
| Ohio River fulvic acid | 9.4                                          | 12.1                                                                         | 1.8                                                                           | 0.85     |
| Fluka AG humic acid    | 4.1                                          | 5.3                                                                          | 0.3                                                                           | 0.94     |
| Aldrich humic acid     | 3.8                                          | 4.9                                                                          | 1.0                                                                           | 0.80     |
| Contech fulvic acid    | 3.8                                          | 4.9                                                                          | 0.6                                                                           | 0.88     |

## References

1. Erickson, P. R.; Moor, K. J.; Werner, J. J.; Latch, D. E.; Arnold, W. A.; McNeill, K., Singlet Oxygen Phosphorescence as a Probe for Triplet-State Dissolved Organic Matter Reactivity. *Environmental Science & Technology* **2018**, 52, (16), 9170-9178.
2. Appiani, E.; Ossola, R.; Latch, D.; Erickson, P. R.; McNeill, K., Aqueous singlet oxygen reaction kinetics of furfuryl alcohol: Effect of temperature, pH, and salt content. *Environmental Science: Processes & Impacts* **2017**, 19, (4), 507-516.
3. Wenk, J.; Eustis, S. N.; McNeill, K.; Canonica, S., Quenching of Excited Triplet States by Dissolved Natural Organic Matter. *Environmental Science & Technology* **2013**, 47, (22), 12802-12810.
4. Canonica, S.; Hellrung, B.; Wirz, J., Oxidation of Phenols by Triplet Aromatic Ketones in Aqueous Solution. *The Journal of Physical Chemistry A* **2000**, 104, (6), 1226-1232.
5. McNeill, K.; Canonica, S., Triplet state dissolved organic matter in aquatic photochemistry: reaction mechanisms, substrate scope, and photophysical properties. *Environmental Science: Processes & Impacts* **2016**, 18, (11), 1381-1399.
6. Flors, C.; Nonell, S., On the Phosphorescence of 1H-Phenalen-1-one. *Helvetica Chimica Acta* **2001**, 84, (9), 2533-2539.
7. Zepp, R. G.; Schlotzhauer, P. F.; Sink, R. M., Photosensitized transformations involving electronic energy transfer in natural waters: role of humic substances. *Environmental Science & Technology* **1985**, 19, (1), 74-81.

202 8. Zhou, H.; Yan, S.; Lian, L.; Song, W., Triplet-State Photochemistry of  
203 Dissolved Organic Matter: Triplet-State Energy Distribution and Surface Electric  
204 Charge Conditions. *Environmental Science & Technology* **2019**, 53, (5), 2482-2490.  
205
